# Supplementary material for: PepQuery enables fast, accurate, and convenient proteomic validation of novel genomic alterations
Source: HighWire-hosted journal article supplement (doi:10.1101/gr.235028.118), 2019-01-04
Supplement: Supplemental_Scripts_.zip [file readme.docx]

**script_1.sh:**

Searching the target peptides from spiked-in protein against the iPRG-2015 dataset using PepQuery.

**script_2.sh:**

Searching the peptides from E. coli against the iPRG-2015 dataset using PepQuery.

**script_3.sh:**

Searching the junction peptides using PepQuery.

**script_4_1.R:**

TP evaluation based on iPRG-2015 dataset.

**script_4_2.R:**

FP evaluation based on iPRG-2015 dataset: Hyperscore.

**script_4_3.R:**

FP evaluation based on iPRG-2015 dataset: MVH.

**generate_random_mutation_peptide.R:**

Generate random mutation peptides.

**script_5_1.pl:**

Colon variant peptides identification using PepQuery: Hyperscore.

**script_5_2.pl:**

Colon variant peptides identification using PepQuery: MVH.

**script_6_1.sh:**

Searching target peptides against E. Coli-human dataset using PepQuery: Hyperscore.

**script_6_2.sh:**

Searching decoy peptides against E. Coli-human dataset using PepQuery: Hyperscore.

**script_6_3.sh:**

Searching target peptides against E. Coli-human dataset using PepQuery: MVH.

**script_6_4.sh**

Searching decoy peptides against E. Coli-human dataset using PepQuery: MVH.

**script_7.pl:**

FDR evaluation based on Colon dataset.

**generate_ref_db.pl:**

generate reference databases for FDR evaluation based on Colon dataset.
