# Supplementary material for: PepQuery enables fast, accurate, and convenient proteomic validation of novel genomic alterations
Source: HighWire-hosted journal article supplement (doi:10.1101/gr.235028.118), 2019-01-04
Supplement: Supplemental_Table_S1.xlsx [file Supplemental_Table_S1.xlsx]

## Sheet: S1 legend
Supplemental Table S1: The target peptide list of iPRG-2015 dataset.

## Sheet: S1
peptide
AEFVEVTK
AFKDEDTQAMPFR
ALELFRNDIAAK
APNDFNLK
ARPEFTLPVHFYGR
AVVQDPALKPLALVYGEATSR
CCAADDKEACFAVEGPK
DAFLGSFLYEYSR
DFPIANGER
DGPLTGTYR
DYYFALAHTVR
DYYFALAHTVRDHLVGR
EIWGVEPSR
ELINSWVESQTNGIIR
ELNYGPHQWR
EYEATLEECCAK
FAAYLER
FGCRDPVR
FKDLGEEHFK
GACLLPK
GGLEPINFQTAADQAR
GHHEAELKPLAQSHATK
GLAGVENVTELKK
GLSDGEWQQVLNVWGK
GYNAQEYYDRIPELR
HGTVVLTALGGILK
HGTVVLTALGGILKK
HIATNAVLFFGR
HLHFTLVK
HLHFTLVKDR
HLQIIYEINQR
HLVDEPQNLIK
HNGPEHWHK
HQQQFFQFR
IENGLLLLNGKPLLIR
IGEEYISDLDQLRK
INMAHLCIAGSHAVNGVAR
ISQAVHAAHAEINEAGR
KGHHEAELKPLAQSHATK
KIKVYLPR
KKGHHEAELKPLAQSHATK
KQTALVELLK
KVPQVSTPTLVEVSR
LAAHPPFASWR
LCVLHEK
LCVLHEKTPVSEK
LFTGHPETLEK
LFTGHPETLEKFDK
LFTGHPETLEKFDKFK
LITAIGDVVNHDPVVGDRLR
LKECCDKPLLEK
LKPDPNTLCDEFKADEK
LKQEYFVVAATLQDIIR
LKQEYFVVAATLQDIIRR
LLSYVDDEAFIRDVAK
LSQKFPK
LVTDLTK
LYAEERYPILPEYLQCVK
MPCTEDYLSLILNR
MSLVEEGAVKR
NLAENISR
QEPERNECFLSHKDDSPDLPK
QLLNCLHVITLYNR
QNNFNAVR
QTALVELLK
RHPEYAVSVLLR
RHPYFYAPELLYYANK
RPCFSALTPDETYVPK
RWLVLCNPGLAEIIAER
SHCIAEVEKDAIPENLPPLTADFAEDKDVCKNYQEAK
SHHWGYGK
SLHTLFGDELCK
SRPLSDQEK
TCAYTNHTVLPEALER
TIAQYAR
TIFKDFYELEPHKFQNK
TQINKVVR
TQQHYYEKDPKR
VAAAFPGDVDR
VEADIAGHGQEVLIR
VFADYEEYVK
VGDANPALQK
VHKECCHGDLLECADDRADLAK
VIFLENYR
VLVDLER
VLYPNDNFFEGKELR
VTEQESKPVQMMYQIGLFR
VVQPNATAWSEAGHISAWQQWR
WPVHLLETLLPR
YEFGIFNQK
YICDNQDTISSK
YLYEIAR
YNGVFQECCQAEDKGACLLPK
