# Supplementary material for: PepQuery enables fast, accurate, and convenient proteomic validation of novel genomic alterations
Source: HighWire-hosted journal article supplement (doi:10.1101/gr.235028.118), 2019-01-04
Supplement: Supplemental_Table_S2.xlsx [file Supplemental_Table_S2.xlsx]

## Sheet: S2 legend
Supplemental Table S2: Identification result of 93 target peptides from the spiked-in proteins using Hyperscore.

## Sheet: S2
peptide	modification	spectrumID	charge	exp_mass	ppm	pep_mass	mz	score	pvalue	mod_filtering
KIKVYLPR	-	13554:JD_06232014_sample1-A	2	1015.65	1.108	1015.65	508.834	17.5358	0.00431832	Removed
AVVQDPALKPLALVYGEATSR	Deamidation of Q@4[0.9840]	37918:JD_06232014_sample1-A	3	2198.21	-7.40386	2198.19	733.744	37.9773	9.999e-05	Retained
AFKDEDTQAMPFR	-	18948:JD_06232014_sample1-A	3	1554.71	2.92681	1554.71	519.244	20.5573	0.0001	Retained
LITAIGDVVNHDPVVGDRLR	Deamidation of N@10[0.9840]	30079:JD_06232014_sample1-A	4	2159.18	-3.39351	2159.17	540.802	32.1846	9.999e-05	Retained
QNNFNAVR	-	7024:JD_06232014_sample1-A	2	961.472	1.07429	961.473	481.743	20.7883	0.00190476	Retained
QLLNCLHVITLYNR	Carbamidomethylation of C@5[57.0215];Deamidation of N@4[0.9840]	33726:JD_06232014_sample1-A	3	1756.95	-9.12439	1756.93	586.656	28.6411	9.999e-05	Retained
TIFKDFYELEPHKFQNK	Deamidation of Q@15[0.9840]	27957:JD_06232014_sample1-A	3	2184.1	-5.18715	2184.09	729.041	19.7324	9.999e-05	Retained
GLAGVENVTELKK	-	19013:JD_06232014_sample1-A	2	1356.76	2.09801	1356.76	679.386	38.4214	0.0001	Retained
KIKVYLPR	-	13487:JD_06232014_sample1-A	3	1015.65	3.39262	1015.65	339.558	20.9174	0.00185071	Retained
LFTGHPETLEK	-	14130:JD_06232014_sample1-A	2	1270.65	2.03441	1270.66	636.334	36.5246	0.000101082	Retained
GHHEAELKPLAQSHATK	-	4976:JD_06232014_sample1-A	3	1852.95	1.75296	1852.95	618.658	44.0135	9.999e-05	Retained
INMAHLCIAGSHAVNGVAR	Carbamidomethylation of C@7[57.0215];Acetylation of peptide N-term@1[42.0106];Oxidation of M@3[15.9949];Deamidation of N@15[0.9840]	12319:JD_06232014_sample1-A	4	2049	-4.07991	2048.99	513.256	31.3073	9.999e-05	Retained
GLAGVENVTELKK	-	19001:JD_06232014_sample1-A	3	1356.76	1.05115	1356.76	453.261	36.4729	0.0001	Retained
GACLLPK	Carbamidomethylation of C@3[57.0215]	12965:JD_06232014_sample1-A	2	757.414	2.68918	757.416	379.714	14.2126	0.00884956	Retained
FAAYLER	-	16590:JD_06232014_sample1-A	2	868.444	0.647809	868.444	435.229	22.239	0.00440529	Retained
DFPIANGER	Deamidation of N@6[0.9840]	16694:JD_06232014_sample1-A	2	1018.47	5.43032	1018.47	510.24	21.3236	0.000338181	Retained
GGLEPINFQTAADQAR	-	27602:JD_06232014_sample1-A	2	1686.83	2.20318	1686.83	844.422	46.7849	9.999e-05	Retained
RHPEYAVSVLLR	-	22121:JD_06232014_sample1-A	2	1438.8	2.55216	1438.8	720.408	17.4205	0.00350105	Retained
LAAHPPFASWR	-	22632:JD_06232014_sample1-A	3	1251.65	3.81757	1251.65	418.223	32.3109	0.000101657	Retained
KKGHHEAELKPLAQSHATK	-	2836:JD_06232014_sample1-A	5	2109.14	2.66348	2109.14	422.835	48.7487	9.999e-05	Retained
AEFVEVTK	-	13996:JD_06232014_sample1-A	2	921.48	0.881382	921.481	461.747	17.1927	0.00246002	Retained
FKDLGEEHFK	-	11774:JD_06232014_sample1-A	3	1248.61	1.70549	1248.61	417.211	40.6289	0.000105675	Retained
TIFKDFYELEPHKFQNK	-	27890:JD_06232014_sample1-A	4	2183.1	1.04466	2183.11	546.783	40.7922	9.999e-05	Retained
LKECCDKPLLEK	Carbamidomethylation of C@4[57.0215];Carbamidomethylation of C@5[57.0215]	8960:JD_06232014_sample1-A	4	1531.77	3.03838	1531.77	383.95	24.6451	0.000100462	Removed
SHCIAEVEKDAIPENLPPLTADFAEDKDVCKNYQEAK	Carbamidomethylation of C@3[57.0215];Carbamidomethylation of C@30[57.0215];Deamidation of N@32[0.9840];Deamidation of N@15[0.9840]	31616:JD_06232014_sample1-A	5	4245.99	-4.09763	4245.97	850.205	36.5946	9.999e-05	Retained
TQQHYYEKDPKR	-	1916:JD_06232014_sample1-A	2	1591.77	1.63475	1591.77	796.893	11.7057	0.00040028	Retained
TQQHYYEKDPKR	-	1908:JD_06232014_sample1-A	3	1591.77	2.46018	1591.77	531.597	23.8924	0.00010007	Retained
KGHHEAELKPLAQSHATK	-	3798:JD_06232014_sample1-A	5	1981.05	2.1652	1981.05	397.216	35.8252	9.999e-05	Retained
LKQEYFVVAATLQDIIRR	Deamidation of Q@3[0.9840]	42974:JD_06232014_sample1-A	3	2163.22	-7.12534	2163.21	722.081	11.2821	0.00069993	Retained
GLSDGEWQQVLNVWGK	-	43118:JD_06232014_sample1-A	2	1814.89	1.27	1814.9	908.454	33.9215	9.999e-05	Retained
DYYFALAHTVRDHLVGR	-	32140:JD_06232014_sample1-A	4	2032.03	1.25762	2032.03	509.014	40.1817	9.999e-05	Retained
HNGPEHWHK	-	956:JD_06232014_sample1-A	3	1140.52	4.31335	1140.52	381.179	20.8172	0.00211665	Retained
LSQKFPK	-	5939:JD_06232014_sample1-A	2	846.494	3.25249	846.496	424.254	19.0716	0.00221239	Retained
VAAAFPGDVDR	-	17268:JD_06232014_sample1-A	2	1116.55	1.56302	1116.56	559.285	31.7601	0.000103157	Retained
HNGPEHWHK	-	803:JD_06232014_sample1-A	3	1140.52	3.22013	1140.52	381.18	14.9161	0.00352775	Retained
LCVLHEKTPVSEK	Carbamidomethylation of C@2[57.0215]	12583:JD_06232014_sample1-A	3	1538.81	3.11198	1538.81	513.943	47.0936	0.0001	Retained
VVQPNATAWSEAGHISAWQQWR	-	33824:JD_06232014_sample1-A	3	2521.22	2.22025	2521.23	841.414	33.1043	9.999e-05	Retained
TQINKVVR	-	4870:JD_06232014_sample1-A	3	956.575	2.20347	956.577	319.865	32.832	0.00123381	Retained
VTEQESKPVQMMYQIGLFR	-	38303:JD_06232014_sample1-A	3	2283.14	0.266259	2283.14	762.053	34.2372	9.999e-05	Retained
YEFGIFNQK	-	28371:JD_06232014_sample1-A	2	1144.55	0.788071	1144.56	573.284	20.3132	0.000253421	Retained
LLSYVDDEAFIRDVAK	-	34692:JD_06232014_sample1-A	2	1852.95	2.12258	1852.96	927.484	35.6186	9.999e-05	Retained
DAFLGSFLYEYSR	-	42619:JD_06232014_sample1-A	2	1566.73	3.07601	1566.74	784.373	29.6168	0.0001	Retained
LITAIGDVVNHDPVVGDRLR	Deamidation of N@10[0.9840]	30092:JD_06232014_sample1-A	3	2159.18	-5.71763	2159.17	720.735	18.2588	0.00019998	Retained
MPCTEDYLSLILNR	Carbamidomethylation of C@3[57.0215]	43602:JD_06232014_sample1-A	2	1723.83	0.756806	1723.83	862.92	28.597	9.999e-05	Retained
ISQAVHAAHAEINEAGR	-	9632:JD_06232014_sample1-A	2	1772.89	2.67318	1772.89	887.451	51.9964	9.999e-05	Retained
ALELFRNDIAAK	Deamidation of N@7[0.9840]	26104:JD_06232014_sample1-A	3	1360.73	1.14082	1360.74	454.585	21.128	0.00010017	Retained
YLYEIAR	-	19021:JD_06232014_sample1-A	2	926.485	1.76879	926.486	464.25	20.524	0.00881057	Retained
SLHTLFGDELCK	Carbamidomethylation of C@11[57.0215]	25564:JD_06232014_sample1-A	3	1418.68	2.64351	1418.69	473.901	19.2216	0.00010007	Retained
TCAYTNHTVLPEALER	Carbamidomethylation of C@2[57.0215]	22566:JD_06232014_sample1-A	3	1873.9	1.27542	1873.9	625.64	48.0791	9.999e-05	Retained
LFTGHPETLEK	-	14069:JD_06232014_sample1-A	3	1270.65	1.86113	1270.66	424.558	35.6109	0.000101082	Retained
QEPERNECFLSHKDDSPDLPK	Carbamidomethylation of C@8[57.0215]	15682:JD_06232014_sample1-A	5	2540.15	2.52875	2540.16	509.038	12.6293	0.00519948	Removed
KKGHHEAELKPLAQSHATK	-	2848:JD_06232014_sample1-A	4	2109.14	2.96087	2109.14	528.292	44.2331	9.999e-05	Retained
RHPYFYAPELLYYANK	-	32064:JD_06232014_sample1-A	4	2044.02	-0.000461603	2044.02	512.012	39.9516	9.999e-05	Retained
VLYPNDNFFEGKELR	-	28658:JD_06232014_sample1-A	3	1839.92	-3.1572	1839.92	614.314	59.4787	9.999e-05	Retained
ELINSWVESQTNGIIR	Deamidation of N@4[0.9840]	36730:JD_06232014_sample1-A	2	1858.95	-4.85217	1858.94	930.483	28.7441	9.999e-05	Retained
DGPLTGTYR	-	12255:JD_06232014_sample1-A	2	978.474	3.01402	978.477	490.244	16.2322	0.00283509	Retained
GHHEAELKPLAQSHATK	-	4966:JD_06232014_sample1-A	4	1852.95	3.45839	1852.95	464.244	46.647	9.999e-05	Retained
DYYFALAHTVR	-	26593:JD_06232014_sample1-A	3	1354.67	1.45626	1354.67	452.562	35.3525	0.000200884	Retained
HGTVVLTALGGILK	-	35500:JD_06232014_sample1-A	2	1377.83	1.91659	1377.83	689.923	50.787	0.00010001	Retained
VFADYEEYVK	-	25062:JD_06232014_sample1-A	2	1261.58	3.06511	1261.59	631.799	23.3214	0.000111099	Retained
NLAENISR	-	9862:JD_06232014_sample1-A	2	915.475	2.39925	915.477	458.745	18.0888	0.00185071	Retained
LKECCDKPLLEK	Carbamidomethylation of C@4[57.0215];Carbamidomethylation of C@5[57.0215]	8958:JD_06232014_sample1-A	3	1531.77	4.26006	1531.77	511.596	46.6264	0.000100462	Retained
LKPDPNTLCDEFKADEK	Carbamidomethylation of C@9[57.0215]	21706:JD_06232014_sample1-A	3	2018.95	4.09729	2018.96	673.992	28.7184	9.999e-05	Retained
VHKECCHGDLLECADDRADLAK	Carbamidomethylation of C@5[57.0215];Carbamidomethylation of C@6[57.0215];Carbamidomethylation of C@13[57.0215]	14587:JD_06232014_sample1-A	5	2611.15	1.81331	2611.16	523.238	36.6897	9.999e-05	Retained
ISQAVHAAHAEINEAGR	-	9671:JD_06232014_sample1-A	4	1772.89	2.41614	1772.89	444.229	38.1973	9.999e-05	Retained
QTALVELLK	-	30106:JD_06232014_sample1-A	2	1013.61	1.9623	1013.61	507.812	21.4441	0.000470367	Retained
ELINSWVESQTNGIIR	-	36786:JD_06232014_sample1-A	3	1857.95	2.06942	1857.96	620.325	38.0526	9.999e-05	Retained
APNDFNLK	-	13737:JD_06232014_sample1-A	2	917.459	1.58556	917.461	459.737	20.3828	0.000616903	Retained
FGCRDPVR	Carbamidomethylation of C@3[57.0215]	5769:JD_06232014_sample1-A	3	1005.48	1.74379	1005.48	336.167	10.2404	0.00997195	Retained
VGDANPALQK	-	6478:JD_06232014_sample1-A	2	1011.53	0.920974	1011.53	506.774	26.3916	0.000102807	Retained
HLQIIYEINQR	-	23567:JD_06232014_sample1-A	3	1425.77	-1.30803	1425.77	476.266	30.6251	0.000101657	Retained
LKQEYFVVAATLQDIIRR	Deamidation of Q@3[0.9840]	42958:JD_06232014_sample1-A	4	2163.22	-7.14741	2163.21	541.812	17.9969	0.00019998	Retained
RWLVLCNPGLAEIIAER	Carbamidomethylation of C@6[57.0215];Deamidation of N@7[0.9840]	41504:JD_06232014_sample1-A	3	2010.09	-7.12393	2010.07	671.036	18.2582	9.999e-05	Retained
YICDNQDTISSK	Carbamidomethylation of C@3[57.0215]	9887:JD_06232014_sample1-A	2	1442.63	2.09801	1442.63	722.323	22.6801	0.00010007	Retained
IGEEYISDLDQLRK	-	28437:JD_06232014_sample1-A	3	1677.85	1.41007	1677.86	560.292	45.9484	0.0001	Retained
EYEATLEECCAK	Carbamidomethylation of C@9[57.0215];Carbamidomethylation of C@10[57.0215]	13242:JD_06232014_sample1-A	2	1501.6	3.30291	1501.61	751.808	31.7527	0.00010101	Retained
VIFLENYR	-	26409:JD_06232014_sample1-A	2	1052.56	1.88181	1052.57	527.289	17.3645	0.00155812	Retained
ARPEFTLPVHFYGR	-	29740:JD_06232014_sample1-A	4	1688.87	2.43026	1688.88	423.226	51.3234	9.999e-05	Retained
SLHTLFGDELCK	Carbamidomethylation of C@11[57.0215]	25572:JD_06232014_sample1-A	2	1418.68	2.12024	1418.69	710.349	40.7215	0.00010007	Retained
SHHWGYGK	Acetylation of peptide N-term@1[42.0106]	6318:JD_06232014_sample1-A	2	1012.45	2.25634	1012.45	507.232	20.3332	0.00123001	Retained
LYAEERYPILPEYLQCVK	Carbamidomethylation of C@16[57.0215]	35553:JD_06232014_sample1-A	3	2283.16	1.35798	2283.16	762.06	40.8034	9.999e-05	Retained
EIWGVEPSR	-	19937:JD_06232014_sample1-A	2	1071.53	0.219811	1071.53	536.775	20.8684	0.000253453	Retained
HLHFTLVKDR	-	12916:JD_06232014_sample1-A	4	1264.7	2.89046	1264.7	317.182	19.0768	0.000211349	Retained
WPVHLLETLLPR	-	43101:JD_06232014_sample1-A	3	1472.85	0.98939	1472.85	491.957	36.684	0.000100452	Retained
LLSYVDDEAFIRDVAK	-	34696:JD_06232014_sample1-A	3	1852.95	3.08458	1852.96	618.658	66.7517	9.999e-05	Retained
HIATNAVLFFGR	-	28921:JD_06232014_sample1-A	3	1344.73	1.48157	1344.73	449.25	21.4227	0.00010003	Retained
VEADIAGHGQEVLIR	-	20268:JD_06232014_sample1-A	3	1605.84	2.45479	1605.85	536.288	63.3829	9.999e-05	Retained
ALELFRNDIAAK	-	24765:JD_06232014_sample1-A	3	1359.75	0.918757	1359.75	454.257	17.8051	0.00010017	Retained
ARPEFTLPVHFYGR	-	29730:JD_06232014_sample1-A	3	1688.87	2.41895	1688.88	563.965	34.5269	9.999e-05	Retained
KQTALVELLK	-	24028:JD_06232014_sample1-A	3	1141.7	1.93542	1141.71	381.576	27.7813	0.000108637	Retained
HLVDEPQNLIK	-	19362:JD_06232014_sample1-A	2	1304.71	1.36327	1304.71	653.361	36.0909	0.00010019	Retained
RPCFSALTPDETYVPK	Carbamidomethylation of C@3[57.0215]	25126:JD_06232014_sample1-A	3	1879.91	2.13648	1879.91	627.644	33.586	9.999e-05	Retained
GYNAQEYYDRIPELR	-	26990:JD_06232014_sample1-A	3	1885.89	3.2261	1885.9	629.637	31.5792	9.999e-05	Retained
CCAADDKEACFAVEGPK	Carbamidomethylation of C@1[57.0215];Carbamidomethylation of C@2[57.0215];Carbamidomethylation of C@10[57.0215]	15380:JD_06232014_sample1-A	3	1926.79	2.00652	1926.79	643.27	63.0438	9.999e-05	Retained
YNGVFQECCQAEDKGACLLPK	Carbamidomethylation of C@8[57.0215];Carbamidomethylation of C@9[57.0215];Carbamidomethylation of C@17[57.0215]	26134:JD_06232014_sample1-A	3	2486.1	2.47449	2486.1	829.706	22.1106	9.999e-05	Retained
LFTGHPETLEKFDKFK	-	23065:JD_06232014_sample1-A	4	1936	2.48898	1936.01	485.008	40.7884	9.999e-05	Retained
RHPYFYAPELLYYANK	-	32016:JD_06232014_sample1-A	3	2044.01	3.20156	2044.02	682.345	47.9917	9.999e-05	Retained
KGHHEAELKPLAQSHATK	-	3796:JD_06232014_sample1-A	4	1981.04	2.77988	1981.05	496.268	20.0591	9.999e-05	Retained
LFTGHPETLEKFDK	-	19391:JD_06232014_sample1-A	3	1660.84	0.94053	1660.85	554.622	30.8398	0.0001	Retained
IENGLLLLNGKPLLIR	Deamidation of N@3[0.9840]	39029:JD_06232014_sample1-A	3	1776.1	-8.45157	1776.09	593.041	24.1784	0.0001	Retained
LCVLHEK	Carbamidomethylation of C@2[57.0215]	7583:JD_06232014_sample1-A	3	897.474	0.542974	897.474	300.165	13.1612	0.00442478	Retained
TQINKVVR	-	4888:JD_06232014_sample1-A	2	956.575	2.18714	956.577	479.295	22.7864	0.00123381	Retained
ALELFRNDIAAK	-	24795:JD_06232014_sample1-A	2	1359.75	3.9379	1359.75	680.88	33.2783	0.00010017	Retained
FKDLGEEHFK	-	11787:JD_06232014_sample1-A	4	1248.61	2.12999	1248.61	313.16	13.7932	0.000422699	Retained
HLHFTLVK	-	15902:JD_06232014_sample1-A	3	993.573	2.58932	993.576	332.198	20.4029	0.00246002	Retained
ELINSWVESQTNGIIR	Deamidation of N@12[0.9840]	34882:JD_06232014_sample1-A	2	1858.93	7.29614	1858.94	930.472	41.3622	9.999e-05	Retained
KVPQVSTPTLVEVSR	-	23096:JD_06232014_sample1-A	2	1638.93	3.06406	1638.93	820.47	36.3022	0.0001	Retained
MSLVEEGAVKR	-	13547:JD_06232014_sample1-A	3	1217.64	2.39577	1217.64	406.888	41.0014	0.000100442	Retained
SHHWGYGK	Acetylation of peptide N-term@1[42.0106]	6371:JD_06232014_sample1-A	3	1012.45	3.20417	1012.45	338.49	26.2283	0.00123001	Retained
VEADIAGHGQEVLIR	-	20343:JD_06232014_sample1-A	2	1605.84	2.46463	1605.85	803.929	54.0377	9.999e-05	Retained
HGTVVLTALGGILK	-	35516:JD_06232014_sample1-A	3	1377.83	1.88565	1377.83	460.285	40.5442	0.00010001	Retained
SRPLSDQEK	Acetylation of peptide N-term@1[42.0106]	4745:JD_06232014_sample1-A	2	1100.54	1.99813	1100.55	551.279	26.8372	0.00038018	Retained
ELNYGPHQWR	-	15132:JD_06232014_sample1-A	3	1298.62	-1.49486	1298.62	433.88	32.0726	0.000101266	Retained
HGTVVLTALGGILKK	-	30677:JD_06232014_sample1-A	3	1505.92	3.02327	1505.93	502.982	51.553	9.999e-05	Retained
HQQQFFQFR	-	20937:JD_06232014_sample1-A	2	1264.61	1.65144	1264.61	633.311	28.8716	0.00571429	Retained
KQTALVELLK	-	24008:JD_06232014_sample1-A	2	1141.71	0.474378	1141.71	571.861	31.3645	0.000108637	Retained
