# Supplementary material for: PepQuery enables fast, accurate, and convenient proteomic validation of novel genomic alterations
Source: HighWire-hosted journal article supplement (doi:10.1101/gr.235028.118), 2019-01-04
Supplement: Supplemental_Table_S4_.xlsx [file Supplemental_Table_S4_.xlsx]

## Sheet: S4 legend
Supplemental Table S4: Identification result of 10,000 E. coli peptides using Hyperscore.

## Sheet: S4
peptide	modification	spectrumID	charge	exp_mass	ppm	pep_mass	mz	score	pvalue	mod_filtering
VMEAIETLPER	Acetylation of peptide N-term@1[42.0106];Oxidation of M@2[15.9949]	25499:JD_06232014_sample1-A	3	1344.65	6.27219	1344.66	449.224	13.824	0.00553933	Removed
VQRNEVIVNYR	Acetylation of peptide N-term@1[42.0106];Deamidation of Q@2[0.9840];Deamidation of N@4[0.9840]	36544:JD_06232014_sample1-A	3	1432.72	6.00881	1432.73	478.581	14.7141	0.00193148	Removed
NAISAVPVMPWR	Acetylation of peptide N-term@1[42.0106]	40522:JD_06232014_sample1-A	2	1381.72	0.411332	1381.72	691.866	12.4844	0.00520364	Removed
ASLGETIDIVDHQGKWLAR	Deamidation of Q@13[0.9840]	44663:JD_06232014_sample1-A	3	2109.08	0.96804	2109.09	704.035	11.8973	0.00169983	Removed
QVNNALARVNNLTQSILAK	Deamidation of N@4[0.9840];Deamidation of N@10[0.9840];Deamidation of N@11[0.9840]	22460:JD_06232014_sample1-A	3	2069.11	-0.635564	2069.11	690.712	11.1589	0.00569943	Removed
YIAYTAGVAPASQPR	Deamidation of Q@13[0.9840]	21699:JD_06232014_sample1-A	2	1564.79	-2.64628	1564.79	783.404	12.197	0.008	Removed
QIIDTCLEMTRLGLNQGTAGNVSVR	Carbamidomethylation of C@6[57.0215];Deamidation of N@21[0.9840];Deamidation of N@15[0.9840]	40009:JD_06232014_sample1-A	3	2747.35	2.20726	2747.36	916.791	10.8729	0.0009999	Removed
LSATLRAQLNNMRDEPR	Acetylation of peptide N-term@1[42.0106];Deamidation of Q@8[0.9840]	33109:JD_06232014_sample1-A	3	2027.02	-1.29367	2027.02	676.682	18.8225	9.999e-05	Removed
DFANLKDK	-	2276:JD_06232014_sample1-A	3	949.495	-8.55244	949.487	317.506	12.6885	0.00431832	Removed
IFAGGDAVRGADLVVTAMAEGR	Oxidation of M@18[15.9949]	30886:JD_06232014_sample1-A	3	2191.12	-8.18949	2191.11	731.382	12.4539	0.0019998	Removed
LIVIEMNPRVSR	Acetylation of peptide N-term@1[42.0106];Oxidation of M@6[15.9949];Deamidation of N@7[0.9840]	28889:JD_06232014_sample1-A	2	1484.8	2.30306	1484.8	743.407	13.9091	0.00140042	Removed
SFYATGDNLQGAR	Deamidation of N@8[0.9840];Deamidation of Q@10[0.9840]	18456:JD_06232014_sample1-A	2	1400.63	-4.00903	1400.62	701.32	15.0222	0.00129987	Retained
AYSTRASDQGPNAGKWDNSK	Deamidation of N@18[0.9840];Deamidation of N@12[0.9840]	21907:JD_06232014_sample1-A	3	2153.98	-6.74872	2153.96	718.999	15.4634	0.00119988	Removed
AGAYGIQGLGGCFVR	Carbamidomethylation of C@12[57.0215];Acetylation of peptide N-term@1[42.0106]	11688:JD_06232014_sample1-A	3	1566.76	3.14537	1566.76	523.259	11.4445	0.00139986	Removed
TLQGWLLPVFMLPMAVYAQEATVK	Oxidation of M@14[15.9949]	43722:JD_06232014_sample1-A	3	2721.45	-9.52673	2721.43	908.158	10.1617	0.00209979	Removed
VVLTEEERR	-	16219:JD_06232014_sample1-A	2	1129.61	3.48636	1129.61	565.81	13.5695	0.00664452	Removed
ALNNATFSKDYEK	Deamidation of N@4[0.9840]	32653:JD_06232014_sample1-A	4	1500.71	1.60984	1500.71	376.184	11.1847	0.00879912	Removed
DVVLSDAMMGYLHFIANIPVK	Deamidation of N@17[0.9840];Acetylation of peptide N-term@1[42.0106]	36903:JD_06232014_sample1-A	3	2375.17	9.05159	2375.19	792.73	11.8301	0.00039996	Removed
SMNVPTVNLGMALGLPAVTETWIK	Deamidation of N@8[0.9840]	33245:JD_06232014_sample1-A	3	2542.29	9.76803	2542.32	848.438	11.5955	0.00289971	Removed
AFNGRPDVLFADEPTGNLDR	Acetylation of peptide N-term@1[42.0106];Deamidation of N@3[0.9840]	31871:JD_06232014_sample1-A	4	2246.05	6.57763	2246.06	562.519	12.1375	0.00389961	Removed
RDYPDVHLQTREMNTR	Acetylation of peptide N-term@1[42.0106];Deamidation of Q@9[0.9840];Deamidation of N@14[0.9840]	2129:JD_06232014_sample1-A	3	2073.95	2.75869	2073.95	692.323	10.1517	0.00069993	Removed
NKRILCAAPEYLQK	Carbamidomethylation of C@6[57.0215];Acetylation of peptide N-term@1[42.0106]	39414:JD_06232014_sample1-A	2	1744.92	8.25956	1744.93	873.465	10.6591	0.00039996	Removed
ELADPAFNAQK	Acetylation of peptide N-term@1[42.0106];Deamidation of Q@10[0.9840]	9709:JD_06232014_sample1-A	2	1245.58	4.79418	1245.59	623.798	11.9423	0.00886293	Retained
TGQIIPPWGQYWVASAYLKDHQPK	Deamidation of Q@10[0.9840]	42569:JD_06232014_sample1-A	4	2783.43	-6.76736	2783.41	696.864	11.9056	0.00129987	Removed
LRQAYLVAR	Deamidation of Q@3[0.9840]	21071:JD_06232014_sample1-A	3	1089.62	9.50668	1089.63	364.214	11.9029	0.00787526	Removed
VDDYPMQQLLR	-	14575:JD_06232014_sample1-A	3	1376.68	-2.81312	1376.68	459.901	14.2694	0.00475083	Removed
VMALDGVVQTTER	Acetylation of peptide N-term@1[42.0106]	16025:JD_06232014_sample1-A	3	1459.73	1.6472	1459.73	487.585	13.9214	0.00059994	Retained
NSIENHFDTSFELEAMLEKR	Acetylation of peptide N-term@1[42.0106];Deamidation of N@5[0.9840]	38154:JD_06232014_sample1-A	3	2452.14	-9.33787	2452.12	818.389	13.3487	9.999e-05	Removed
SAVESYAK	-	5094:JD_06232014_sample1-A	2	853.425	-8.49554	853.418	427.72	11.1821	0.00492005	Removed
LSFETSMHRLGASVVGFSDSANTSLGKK	Acetylation of peptide N-term@1[42.0106];Deamidation of N@22[0.9840];Oxidation of M@7[15.9949]	33660:JD_06232014_sample1-A	4	2984.45	0.95673	2984.45	747.12	11.3257	0.00049995	Removed
YWRDNFSAAYDLNR	Acetylation of peptide N-term@1[42.0106]	22677:JD_06232014_sample1-A	3	1831.84	-5.25557	1831.83	611.62	11.049	0.0095	Removed
ITAGVHAENGHMAVQLWHTGR	-	11943:JD_06232014_sample1-A	3	2284.11	7.81812	2284.13	762.377	10.3137	0.00919908	Removed
GTVSLSGTNDWKGQINVYDGTR	-	34996:JD_06232014_sample1-A	2	2367.13	5.14474	2367.15	1184.57	10.8757	0.00589941	Removed
VYRATESAAWQEAR	Acetylation of peptide N-term@1[42.0106];Deamidation of Q@11[0.9840]	9359:JD_06232014_sample1-A	2	1679.8	-6.18379	1679.79	840.908	12.4869	0.00829917	Retained
AGEESVAQVSGVR	Deamidation of Q@8[0.9840]	3686:JD_06232014_sample1-A	2	1288.63	0.630924	1288.63	645.32	11.8593	0.00980196	Retained
VLVDVNKARTMSQR	-	16930:JD_06232014_sample1-A	3	1615.89	-4.61464	1615.88	539.637	11.847	0.00679932	Removed
MICSPQNNTGVIMK	Carbamidomethylation of C@3[57.0215];Acetylation of peptide N-term@1[42.0106];Deamidation of N@7[0.9840];Deamidation of N@8[0.9840]	28717:JD_06232014_sample1-A	3	1635.75	-9.10436	1635.73	546.256	11.3899	0.00629937	Removed
ESQKISPEDIVIAMSSGSK	Oxidation of M@14[15.9949]	38280:JD_06232014_sample1-A	3	2020.98	9.93839	2021	674.667	12.0414	0.00059994	Removed
QFGKGSIMR	-	26776:JD_06232014_sample1-A	2	1022.53	2.77555	1022.53	512.272	10.442	0.000886974	Removed
ARVDGIRYQVDINNLTQR	Deamidation of Q@17[0.9840];Acetylation of peptide N-term@1[42.0106];Deamidation of N@14[0.9840]	31849:JD_06232014_sample1-A	3	2174.09	9.99488	2174.11	725.703	14.6816	0.00179982	Removed
KTTLSEEDQALFR	Acetylation of peptide N-term@1[42.0106]	39591:JD_06232014_sample1-A	3	1578.77	9.38759	1578.79	527.265	11.1807	0.0089	Removed
RQTGVIFPADSVK	Deamidation of Q@2[0.9840]	33808:JD_06232014_sample1-A	2	1417.76	0.957154	1417.76	709.885	10.4826	0.00079992	Removed
VTQQNASLVQESAAAAAALEEQASR	Deamidation of Q@10[0.9840]	21620:JD_06232014_sample1-A	3	2543.23	6.56732	2543.25	848.75	11.0809	0.00409959	Removed
LHAPDNAWVQQTR	Deamidation of N@6[0.9840];Deamidation of Q@11[0.9840]	28994:JD_06232014_sample1-A	2	1536.72	4.75965	1536.73	769.37	13.4159	0.00069993	Removed
VTQSDRDLFK	Acetylation of peptide N-term@1[42.0106];Deamidation of Q@3[0.9840]	31214:JD_06232014_sample1-A	2	1250.62	-7.53917	1250.61	626.319	10.2012	0.00226175	Removed
LSATLRAQLNNMRDEPR	Acetylation of peptide N-term@1[42.0106];Deamidation of N@10[0.9840];Deamidation of N@11[0.9840]	33130:JD_06232014_sample1-A	2	2028.02	-7.88301	2028.01	1015.02	10.7947	0.00019998	Removed
NFSLQGNVNNLFDK	Deamidation of Q@5[0.9840];Deamidation of N@9[0.9840]	29208:JD_06232014_sample1-A	2	1610.76	-1.82683	1610.76	806.388	11.2384	0.00830083	Removed
FECLDLQAKGNYTSEK	Carbamidomethylation of C@3[57.0215];Deamidation of Q@7[0.9840];Deamidation of N@11[0.9840]	34289:JD_06232014_sample1-A	3	1903.83	9.32174	1903.85	635.618	15.0969	0.00019998	Removed
