# Supplementary material for: PepQuery enables fast, accurate, and convenient proteomic validation of novel genomic alterations
Source: HighWire-hosted journal article supplement (doi:10.1101/gr.235028.118), 2019-01-04
Supplement: Supplemental_Table_S5_.xlsx [file Supplemental_Table_S5_.xlsx]

## Sheet: S5 legend
Supplemental Table S5: Identification result of 10,000 E. coli peptides using MVH.

## Sheet: S5
peptide	modification	spectrumID	charge	exp_mass	ppm	pep_mass	mz	score	pvalue	mod_filtering
LKQDGIGACLLKPLTPTRLLPALTEFCHHK	Carbamidomethylation of C@9[57.0215];Carbamidomethylation of C@27[57.0215];Acetylation of peptide N-term@1[42.0106];Deamidation of Q@3[0.9840]	39583:JD_06232014_sample1-A	3	3469.83	6.81856	3469.86	1157.62	18.0279	0.00109989	Removed
LENLITAEEQVLSNLEVSRDGVEK	Deamidation of N@3[0.9840];Deamidation of N@14[0.9840]	17463:JD_06232014_sample1-A	3	2686.37	-4.38297	2686.35	896.463	28.0937	0.00019998	Removed
LENLITAEEQVLSNLEVSRDGVEK	Acetylation of peptide N-term@1[42.0106];Deamidation of N@3[0.9840];Deamidation of Q@10[0.9840]	16343:JD_06232014_sample1-A	3	2728.38	-5.20826	2728.37	910.467	11.6213	0.00139986	Removed
RGMQNTPDMRER	Deamidation of Q@4[0.9840];Oxidation of M@9[15.9949]	25915:JD_06232014_sample1-A	2	1506.68	-8.5522	1506.67	754.347	13.8455	0.00920276	Removed
TLQGWLLPVFMLPMAVYAQEATVK	Oxidation of M@14[15.9949]	43722:JD_06232014_sample1-A	3	2721.45	-9.52673	2721.43	908.158	11.4524	0.00139986	Removed
LPQEEKMEKEDSFPQR	Acetylation of peptide N-term@1[42.0106];Deamidation of Q@3[0.9840];Deamidation of Q@15[0.9840]	20746:JD_06232014_sample1-A	3	2033.91	8.87997	2033.93	678.976	20.8928	0.00069993	Removed
AHGLNVACEQLR	Carbamidomethylation of C@8[57.0215];Acetylation of peptide N-term@1[42.0106]	16628:JD_06232014_sample1-A	2	1408.69	-0.91902	1408.69	705.352	10.7581	0.00640192	Removed
RDYPDVHLQTREMNTR	Acetylation of peptide N-term@1[42.0106];Deamidation of Q@9[0.9840];Deamidation of N@14[0.9840]	2129:JD_06232014_sample1-A	3	2073.95	2.75869	2073.95	692.323	16.4464	0.0009999	Removed
NSIENHFDTSFELEAMLEKR	Acetylation of peptide N-term@1[42.0106];Deamidation of N@5[0.9840]	38154:JD_06232014_sample1-A	3	2452.14	-9.33787	2452.12	818.389	12.8495	0.0009999	Removed
ALDATTKSAVYDFK	-	25133:JD_06232014_sample1-A	2	1528.77	4.23628	1528.78	765.393	10.8343	0.00209979	Removed
VIARLGQRTDTSDADGQIVEERPVTFSAEQLAAALDTFR	Deamidation of Q@17[0.9840];Deamidation of Q@7[0.9840];Deamidation of Q@30[0.9840]	20210:JD_06232014_sample1-A	4	4249.12	-1.97401	4249.11	1063.29	21.569	0.00189981	Removed
IQAVDRQEDKLADDVDVAIFYGR	-	27872:JD_06232014_sample1-A	3	2635.32	2.53919	2635.32	879.446	14.9107	0.00579942	Removed
ASGGSFRQVTSMEEAFK	-	27788:JD_06232014_sample1-A	3	1830.84	8.18499	1830.86	611.288	20.1592	0.00769923	Removed
LAEQGADSSADDAAAINALR	Deamidation of N@17[0.9840];Acetylation of peptide N-term@1[42.0106]	43489:JD_06232014_sample1-A	3	2000.94	-7.94945	2000.93	667.989	17.2143	0.00019998	Removed
NAQFMLDVMR	Acetylation of peptide N-term@1[42.0106]	21656:JD_06232014_sample1-A	2	1265.6	-5.88078	1265.59	633.806	14.41	0.00267325	Removed
NAISAVPVMPWR	Acetylation of peptide N-term@1[42.0106]	40522:JD_06232014_sample1-A	2	1381.72	0.411332	1381.72	691.866	17.9442	0.00540378	Removed
TQAAMMLNISS	Acetylation of peptide N-term@1[42.0106];Oxidation of M@6[15.9949];Deamidation of N@8[0.9840]	8811:JD_06232014_sample1-A	2	1224.53	5.00935	1224.54	613.273	22.163	0.000301326	Removed
YMGGLQGLRNASVEEIAKVPGISQGLAEK	Acetylation of peptide N-term@1[42.0106]	28499:JD_06232014_sample1-A	3	3056.62	-8.54214	3056.6	1019.88	23.2277	0.00049995	Removed
AIANQGCAEMDSGNQVASKSSK	Carbamidomethylation of C@7[57.0215];Deamidation of N@14[0.9840];Deamidation of Q@15[0.9840]	21557:JD_06232014_sample1-A	3	2254	-7.18268	2253.98	752.341	10.5157	0.0049995	Removed
AGEESVAQVSGVR	Deamidation of Q@8[0.9840]	3686:JD_06232014_sample1-A	2	1288.63	0.630924	1288.63	645.32	12.5066	0.00540108	Removed
DSMGAIDVPADKLWGAQTQRSLEHFR	Acetylation of peptide N-term@1[42.0106]	20923:JD_06232014_sample1-A	3	2969.42	9.51476	2969.45	990.813	11.287	0.0049995	Removed
VTQSDRDLFK	Acetylation of peptide N-term@1[42.0106];Deamidation of Q@3[0.9840]	31214:JD_06232014_sample1-A	2	1250.62	-7.53917	1250.61	626.319	26.4124	0.00246736	Removed
FVLNQPANARPK	Acetylation of peptide N-term@1[42.0106];Deamidation of N@4[0.9840]	25600:JD_06232014_sample1-A	2	1396.74	3.41769	1396.75	699.378	18.2688	0.00440308	Removed
ELGPMTVEDLAQR	Deamidation of Q@12[0.9840]	6839:JD_06232014_sample1-A	3	1458.69	6.96537	1458.7	487.238	28.0809	0.00569943	Removed
EQGLVMNLQQDIWVSDEVFR	Deamidation of N@7[0.9840];Deamidation of Q@9[0.9840]	30223:JD_06232014_sample1-A	3	2407.15	-6.86637	2407.14	803.392	19.3699	0.00089991	Removed
LIQLYDLLAQIQQK	Deamidation of Q@3[0.9840];Deamidation of Q@10[0.9840]	43044:JD_06232014_sample1-A	2	1687.95	-5.29862	1687.94	844.982	12.419	0.0071064	Removed
NAAREGDANPLTGKR	Acetylation of peptide N-term@1[42.0106]	42294:JD_06232014_sample1-A	4	1610.82	-6.57213	1610.81	403.713	16.3315	0.00049995	Removed
QQQGDCPTGHAVITLAGDLPAK	Carbamidomethylation of C@6[57.0215];Deamidation of Q@2[0.9840]	15050:JD_06232014_sample1-A	2	2277.11	-3.04916	2277.11	1139.56	17.3932	0.00059994	Removed
RQTGVIFPADSVK	Deamidation of Q@2[0.9840]	33808:JD_06232014_sample1-A	2	1417.76	0.957154	1417.76	709.885	19.8061	0.00359964	Removed
DTGAAAEPRAPVVTIMGHVDHGK	Oxidation of M@16[15.9949]	28970:JD_06232014_sample1-A	3	2344.15	3.04369	2344.16	782.391	12.9746	0.00339966	Removed
FECLDLQAKGNYTSEK	Carbamidomethylation of C@3[57.0215];Deamidation of Q@7[0.9840];Deamidation of N@11[0.9840]	34289:JD_06232014_sample1-A	3	1903.83	9.32174	1903.85	635.618	18.6218	0.00589941	Removed
QVNNALARVNNLTQSILAK	Deamidation of N@4[0.9840];Deamidation of N@10[0.9840];Deamidation of N@11[0.9840]	22460:JD_06232014_sample1-A	3	2069.11	-0.635564	2069.11	690.712	22.7205	0.00209979	Removed
FDFRNVEASFELNDASKTIK	-	34716:JD_06232014_sample1-A	3	2330.15	0.584099	2330.15	777.725	23.5242	0.00019998	Removed
QIIDTCLEMTRLGLNQGTAGNVSVR	Carbamidomethylation of C@6[57.0215];Deamidation of N@21[0.9840];Deamidation of N@15[0.9840]	40009:JD_06232014_sample1-A	3	2747.35	2.20726	2747.36	916.791	12.9468	0.0019998	Removed
DFANLKDK	-	2276:JD_06232014_sample1-A	3	949.495	-8.55244	949.487	317.506	19.6834	0.00370142	Removed
YLCRIRQMOGLNAIEHSNYLR	Carbamidomethylation of C@3[57.0215];Deamidation of N@18[0.9840];Oxidation of M@8[15.9949];Deamidation of N@12[0.9840]	13474:JD_06232014_sample1-A	3	2761.38	1.36728	2761.38	921.466	14.4734	0.0009999	Removed
MMFAAAGAPAPVADSVLTDFK	-	40549:JD_06232014_sample1-A	3	2109.04	-4.66066	2109.03	704.02	13.1885	0.00139986	Removed
LFAPGLHVLSYNEVPDELELK	Deamidation of N@12[0.9840]	38607:JD_06232014_sample1-A	3	2383.24	-2.74487	2383.23	795.42	13.2041	0.00319968	Removed
RLGCEVTEGK	Carbamidomethylation of C@4[57.0215];Acetylation of peptide N-term@1[42.0106]	4014:JD_06232014_sample1-A	2	1189.57	8.70273	1189.58	595.79	16.4211	0.000634048	Retained
TGQIIPPWGQYWVASAYLKDHQPK	Deamidation of Q@22[0.9840]	42569:JD_06232014_sample1-A	4	2783.43	-6.76736	2783.41	696.864	14.8896	0.00349965	Removed
IDSMYNLRMYSR	Oxidation of M@9[15.9949]	3477:JD_06232014_sample1-A	3	1563.71	6.65536	1563.72	522.243	17.8691	0.00140098	Removed
AWFCGHEFYVDERVLVPR	Carbamidomethylation of C@4[57.0215]	24592:JD_06232014_sample1-A	2	2279.12	-9.20583	2279.09	1140.57	13.9748	0.0049995	Removed
LLRENFQFNADAEISIEVDPR	Deamidation of N@5[0.9840];Deamidation of Q@7[0.9840];Deamidation of N@9[0.9840]	31627:JD_06232014_sample1-A	4	2478.21	-8.03973	2478.19	620.56	18.7894	0.00639936	Removed
VDYSTFLQEVNNDQVREAR	Deamidation of Q@8[0.9840];Deamidation of Q@14[0.9840]	29265:JD_06232014_sample1-A	3	2284.08	-7.90204	2284.06	762.367	16.4171	0.00319968	Removed
VFDTNDFIIITQRFHCER	Carbamidomethylation of C@16[57.0215];Deamidation of Q@12[0.9840]	32917:JD_06232014_sample1-A	3	2311.11	-2.53518	2311.11	771.378	15.3196	0.00119988	Removed
LSFETSMHRLGASVVGFSDSANTSLGKK	Acetylation of peptide N-term@1[42.0106];Deamidation of N@22[0.9840];Oxidation of M@7[15.9949]	33660:JD_06232014_sample1-A	4	2984.45	0.95673	2984.45	747.12	18.3251	0.00019998	Removed
FQPGMYVPTQASWGHNNR	Deamidation of N@16[0.9840];Deamidation of Q@2[0.9840]	24310:JD_06232014_sample1-A	2	2090.93	-0.347739	2090.93	1046.47	19.4284	9.999e-05	Removed
AASEEYNWDLNYGEIAK	Acetylation of peptide N-term@1[42.0106];Deamidation of N@7[0.9840];Deamidation of N@11[0.9840]	35889:JD_06232014_sample1-A	4	2015.85	5.65037	2015.86	504.97	13.2582	0.00339966	Removed
VQRNEVIVNYR	Acetylation of peptide N-term@1[42.0106];Deamidation of Q@2[0.9840];Deamidation of N@4[0.9840]	36544:JD_06232014_sample1-A	3	1432.72	6.00881	1432.73	478.581	17.0722	0.00233811	Removed
DADKQEYTGAR	-	16865:JD_06232014_sample1-A	2	1252.56	6.58453	1252.57	627.287	11.2554	0.00271193	Removed
SNHAASFQNYHATIDGK	Deamidation of N@2[0.9840];Deamidation of Q@8[0.9840]	46311:JD_06232014_sample1-A	3	1861.84	-9.75602	1861.82	621.621	12.75	0.00079992	Removed
TIGSTRMDIKIAHAR	Oxidation of M@7[15.9949]	27871:JD_06232014_sample1-A	2	1684.91	-1.23021	1684.9	843.46	15.3502	0.00449955	Removed
GAITCPTGVAK	Carbamidomethylation of C@5[57.0215]	18867:JD_06232014_sample1-A	2	1073.55	-0.680957	1073.55	537.785	26.9194	0.000707571	Removed
VADISQHMAALALEQEKSRQHIEQLIQFDPMTGLPNR	Deamidation of N@36[0.9840]	33930:JD_06232014_sample1-A	4	4215.15	-7.25324	4215.12	1054.8	24.3545	0.00629937	Removed
STFQQLPGTGVKPDQFHSQTR	Deamidation of Q@19[0.9840];Deamidation of Q@4[0.9840];Deamidation of Q@15[0.9840]	25940:JD_06232014_sample1-A	3	2361.12	3.16431	2361.12	788.046	22.9825	0.00019998	Removed
LLWDAHESGNARFDD	Deamidation of N@10[0.9840]	32352:JD_06232014_sample1-A	3	1745.76	3.37968	1745.76	582.927	12.2273	0.00409959	Removed
RFWNAGAPEMATRAYMVPTK	Oxidation of M@16[15.9949];Acetylation of peptide N-term@1[42.0106];Oxidation of M@10[15.9949]	29959:JD_06232014_sample1-A	3	2370.11	5.13838	2370.12	791.045	18.9534	0.00089991	Removed
LHVTSAYPISEKQKGK	Acetylation of peptide N-term@1[42.0106];Deamidation of Q@13[0.9840]	39796:JD_06232014_sample1-A	3	1827.97	0.344742	1827.97	610.331	13.4752	0.00139986	Removed
DLGVWGDQDLVKYVDVGATYYFNK	Deamidation of Q@8[0.9840]	29907:JD_06232014_sample1-A	3	2765.31	4.83112	2765.32	922.777	15.5435	0.00789921	Removed
LELPDGDFVDLAWSENPAQAQHKPR	Deamidation of N@16[0.9840];Deamidation of Q@19[0.9840]	41414:JD_06232014_sample1-A	5	2834.37	-5.48861	2834.35	567.881	11.0086	0.00139986	Removed
AWFCGHEFYVDERVLVPR	Carbamidomethylation of C@4[57.0215]	24546:JD_06232014_sample1-A	3	2279.11	-8.93947	2279.09	760.712	22.7289	0.0019998	Removed
ALYKVLAQR	Deamidation of Q@8[0.9840]	35494:JD_06232014_sample1-A	2	1061.63	-3.11057	1061.62	531.821	12.1939	0.00897779	Removed
ASQVNGSNIYAFR	Acetylation of peptide N-term@1[42.0106];Deamidation of Q@3[0.9840];Deamidation of N@5[0.9840]	37519:JD_06232014_sample1-A	3	1469.69	-8.30504	1469.68	490.904	12.2998	0.0007	Removed
YIAYTAGVAPASQPR	Deamidation of Q@13[0.9840]	21699:JD_06232014_sample1-A	2	1564.79	-2.64628	1564.79	783.404	24.4465	0.0041	Removed
AIANQGCAEMDSGNQVASKSSK	Carbamidomethylation of C@7[57.0215];Acetylation of peptide N-term@1[42.0106];Deamidation of N@4[0.9840];Deamidation of N@14[0.9840]	37707:JD_06232014_sample1-A	4	2296	-3.75644	2295.99	575.008	21.7289	9.999e-05	Removed
GAYWDSEIKRAQMDGLEGYPVYTR	Acetylation of peptide N-term@1[42.0106]	35735:JD_06232014_sample1-A	3	2846.32	3.27136	2846.33	949.782	12.6021	0.00169983	Removed
GVAIIMQKSGIPDIDQANCMIK	Carbamidomethylation of C@19[57.0215];Oxidation of M@20[15.9949]	32166:JD_06232014_sample1-A	4	2417.2	4.66939	2417.21	605.307	12.4679	0.00259974	Removed
QLQQKSYTPQNRSK	Deamidation of Q@3[0.9840]	35534:JD_06232014_sample1-A	2	1705.88	-3.39157	1705.87	853.948	21.8536	0.00239976	Removed
LIVIEMNPRVSR	Acetylation of peptide N-term@1[42.0106];Oxidation of M@6[15.9949];Deamidation of N@7[0.9840]	28889:JD_06232014_sample1-A	2	1484.8	2.30306	1484.8	743.407	15.2841	0.00030009	Removed
SFYATGDNLQGAR	Deamidation of N@8[0.9840];Deamidation of Q@10[0.9840]	18456:JD_06232014_sample1-A	2	1400.63	-4.00903	1400.62	701.32	38.4557	0.0009999	Retained
RNDVNPEITDR	Acetylation of peptide N-term@1[42.0106]	27994:JD_06232014_sample1-A	2	1369.66	0.267325	1369.66	685.836	22.9024	0.000100442	Removed
WLTAGAGIAYVPLMWVINEINR	Oxidation of M@14[15.9949]	23759:JD_06232014_sample1-A	3	2502.32	-3.54112	2502.31	835.113	21.9888	0.00029997	Removed
KSYQMNPMNRR	Acetylation of peptide N-term@1[42.0106];Deamidation of N@9[0.9840]	5291:JD_06232014_sample1-A	3	1466.66	9.94354	1466.68	489.894	23.5083	0.00140619	Retained
ARLNDMEHR	-	5488:JD_06232014_sample1-A	2	1140.54	5.84528	1140.55	571.277	12.9712	0.00450907	Removed
TQSDEQTATQWINWLGR	Deamidation of Q@2[0.9840];Deamidation of Q@6[0.9840];Deamidation of N@13[0.9840]	36626:JD_06232014_sample1-A	3	2035.9	6.23766	2035.91	679.64	14.1873	0.00459954	Removed
SKALVGSEDLPVLDENTFNSHAPAPSSR	Acetylation of peptide N-term@1[42.0106];Deamidation of N@19[0.9840]	16388:JD_06232014_sample1-A	3	2980.43	3.48305	2980.44	994.484	19.6956	0.00189981	Removed
LPSQRAAEEK	Deamidation of Q@4[0.9840]	15332:JD_06232014_sample1-A	2	1128.58	-0.312347	1128.58	565.296	15.4338	0.00243052	Removed
YQADGSVIPWLAKSWTHSEDGK	Deamidation of Q@2[0.9840]	22393:JD_06232014_sample1-A	2	2475.17	-1.32112	2475.17	1238.59	10.3073	0.00609939	Removed
INGATVDVR	Deamidation of N@2[0.9840]	23480:JD_06232014_sample1-A	2	944.491	1.94864	944.493	473.253	32.4904	0.000760264	Retained
GFAQRDDEQMAAFR	Deamidation of Q@4[0.9840];Deamidation of Q@9[0.9840]	7111:JD_06232014_sample1-A	3	1642.7	3.90414	1642.7	548.573	26.0447	0.00029997	Removed
VLGEAHTMNSDEFER	Deamidation of N@9[0.9840]	28357:JD_06232014_sample1-A	2	1734.75	2.86258	1734.75	868.381	15.4282	0.00279972	Removed
LSATLRAQLNNMRDEPR	Acetylation of peptide N-term@1[42.0106];Deamidation of N@10[0.9840];Deamidation of N@11[0.9840]	33130:JD_06232014_sample1-A	2	2028.02	-7.88301	2028.01	1015.02	26.3671	9.999e-05	Retained
FVELYPVLQQQAQTDGK	Deamidation of Q@9[0.9840];Deamidation of Q@10[0.9840];Deamidation of Q@13[0.9840]	42897:JD_06232014_sample1-A	3	1965.94	8.79882	1965.96	656.321	10.2373	0.00789921	Removed
RQTGVIFPADSVK	Acetylation of peptide N-term@1[42.0106];Deamidation of Q@2[0.9840]	20563:JD_06232014_sample1-A	3	1459.77	-4.68306	1459.77	487.599	32.0215	0.00019998	Removed
ELADPAFNAQK	Acetylation of peptide N-term@1[42.0106];Deamidation of Q@10[0.9840]	9709:JD_06232014_sample1-A	2	1245.58	4.79418	1245.59	623.798	16.1259	0.00997079	Removed
SQRTASLAGAGSQHFNVDDGQK	Acetylation of peptide N-term@1[42.0106]	29060:JD_06232014_sample1-A	3	2315.09	0.156513	2315.09	772.704	19.1281	0.00259974	Removed
GLAEKLTARLNELYAAR	Acetylation of peptide N-term@1[42.0106];Deamidation of N@11[0.9840]	37608:JD_06232014_sample1-A	2	1931.04	5.26987	1931.05	966.526	15.1652	0.00409959	Removed
VGVLSNDFFVNLLDMR	Deamidation of N@11[0.9840]	25192:JD_06232014_sample1-A	3	1838.92	2.66506	1838.92	613.98	16.423	0.0089991	Removed
RSQMNMKQDER	-	6067:JD_06232014_sample1-A	2	1421.66	-6.95334	1421.65	711.837	16.1047	0.00361591	Removed
IQERYGYQKDQAEK	Deamidation of Q@11[0.9840]	28354:JD_06232014_sample1-A	2	1755.83	5.16214	1755.84	878.924	19.8478	0.00069993	Removed
QGTHEYQVLVTRCK	Carbamidomethylation of C@13[57.0215];Deamidation of Q@7[0.9840]	16322:JD_06232014_sample1-A	3	1718.83	6.91222	1718.84	573.95	23.4183	0.00089991	Removed
EYPLEWKVGDEPYYPVNDNKNMELFK	Deamidation of N@17[0.9840];Acetylation of peptide N-term@1[42.0106];Deamidation of N@19[0.9840]	33473:JD_06232014_sample1-A	3	3260.5	-2.5872	3260.49	1087.84	20.5249	9.999e-05	Removed
TEVTLEEYCSLIWK	Carbamidomethylation of C@9[57.0215];Acetylation of peptide N-term@1[42.0106]	23445:JD_06232014_sample1-A	2	1811.86	4.01201	1811.87	906.936	19.7177	0.0009999	Removed
KTVETHRLNIMK	Acetylation of peptide N-term@1[42.0106]	9643:JD_06232014_sample1-A	3	1510.83	-0.852179	1510.83	504.617	24.5435	0.00230023	Removed
LFGEKLFSNPNSK	Deamidation of N@9[0.9840];Deamidation of N@11[0.9840]	18874:JD_06232014_sample1-A	2	1481.73	9.146	1481.74	741.871	21.4406	0.0002	Removed
LNLSLDSQLYPQISGHKSR	Deamidation of N@2[0.9840];Deamidation of Q@12[0.9840]	37469:JD_06232014_sample1-A	3	2157.13	-9.72962	2157.11	720.05	15.1146	0.00179982	Removed
VVGDVIGKYHPHGDSAVYDTIVR	Acetylation of peptide N-term@1[42.0106]	30289:JD_06232014_sample1-A	4	2538.29	-1.68462	2538.29	635.58	29.0816	0.00129987	Removed
