# Supplementary material for: PepQuery enables fast, accurate, and convenient proteomic validation of novel genomic alterations
Source: HighWire-hosted journal article supplement (doi:10.1101/gr.235028.118), 2019-01-04
Supplement: Supplemental_Table_S6.xlsx [file Supplemental_Table_S6.xlsx]

## Sheet: S6 legend
Supplemental Table S6: The 55 junction peptide list.

## Sheet: S6
peptide
GAVDDDVAEDIISTVEFNHSGELLATGDK
SGGTLVLVGLGSEMTTVPLLHAAIR
EEEMQVDQEEPHVEEQQQQTPAENK
FEESKEPVADEEEEDSDDDVEPITEFR
LQGSATAAEAQVGHQTAR
TEQGPTGVTMTSNPITWGQIK
ETWVEEDELFQVQAPDEDSTTNITK
GTQEAEEEGSEATPEAGPEGQETAEITDFQR
LSAQMLVPVTPEVKPK
TTYFEIFTAACNPSACR
TEEEDVPSDLTAEER
DGGNPFAEPSELDNPFQASAAAATAELLK
YSTGSDSASFPHTTPSMCLNPDLEGPPLELTK
LASVPAGGAVAVSAAPGSAAPAAGSAPAAEEK
LSIRPNIQNPDPAVYQLR
LANQDEGPEDEEDEQNSPVAPTAQPK
GYATDESTVSSVQGSR
KNCQINSALTSFHTALELAVDQR
EENPEGPPNANEDYR
EEEMGEEEVEREIIK
DGYELSPTAAANFTR
MLDAEDIVGTLRPDEK
LGPGGLDPVEELQK
ENEQGEVDMESHR
QTNPSAMVEEDDPVPEIR
ATPEPGDEGEPGR
AQEDALAQQAFEEAR
ERGMEEGEFSEAREDMAALEK
DPWYSTVGLLPPVR
ERGMEEGEFSEAR
LGEVEDSTMPIR
VGNMSESELGR
SSQSEEEEEVFGIPR
NLEALALDLMEPEQAVDLTYNEGSGSK
SEVADFEPER
SMYEEINETR
RDPWYSTVGLLPPVR
SSTDSLPGELR
FLACIHNLK
YISLIYTNYAGK
KIDLSDTK
SGLELPLR
ILLIHQR
KSMYEEINETR
LLLGASK
VALPTSK
SFFCCSSVLDALEGK
ISARVMSLFSNK
QQDNLELSLR
LIIVVR
LDEIIK
MLLIAR
LYFLPSK
ITEELK
ESIAQVR
