# Supplementary material for: PepQuery enables fast, accurate, and convenient proteomic validation of novel genomic alterations
Source: HighWire-hosted journal article supplement (doi:10.1101/gr.235028.118), 2019-01-04
Supplement: Supplemental_Table_S7.xlsx [file Supplemental_Table_S7.xlsx]

## Sheet: S7 legend
Supplemental Table S7: Identification result of 55 junction peptides using Hyperscore.

## Sheet: S7
peptide	modification	spectrumID	charge	exp_mass	ppm	pep_mass	mz	score	pvalue	mod_filtering
GAVDDDVAEDIISTVEFNHSGELLATGDK	-	36185:all_format	3	3016.42	-1.6048	3016.41	1006.48	44.9366	9.999e-05	Retained
ENEQGEVDMESHR	-	376795:all_format	2	1558.63	1.16803	1558.63	780.322	42.6257	0.00010001	Retained
LANQDEGPEDEEDEQNSPVAPTAQPK	-	393908:all_format	3	2807.23	2.15075	2807.24	936.751	47.8919	9.999e-05	Retained
LSAQMLVPVTPEVKPK	-	233055:all_format	3	1735.99	0.812304	1735.99	579.67	45.4956	9.999e-05	Retained
DGGNPFAEPSELDNPFQASAAAATAELLK	-	137542:all_format	3	2930.39	2.33384	2930.39	977.803	35.539	9.999e-05	Retained
ETWVEEDELFQVQAPDEDSTTNITK	-	467426:all_format	3	2923.3	7.82232	2923.32	975.441	52.7522	9.999e-05	Retained
LSIRPNIQNPDPAVYQLR	-	189434:all_format	3	2093.12	6.86589	2093.14	698.715	15.9658	9.999e-05	Retained
ERGMEEGEFSEAREDMAALEK	-	431412:all_format	3	2413.03	9.2392	2413.05	805.351	11.692	0.00049995	Retained
ATPEPGDEGEPGR	-	366361:all_format	2	1310.57	0.128992	1310.57	656.294	35.2642	0.00010022	Retained
KSMYEEINETR	-	394949:all_format	2	1398.64	5.54055	1398.64	700.326	20.3021	0.000503575	Removed
ENEQGEVDMESHR	Oxidation of M@9[15.9949]	366734:all_format	3	1574.63	-0.16566	1574.63	525.883	47.2306	0.00010001	Retained
SFFCCSSVLDALEGK	Carbamidomethylation of C@4[57.0215];Carbamidomethylation of C@5[57.0215]	447226:all_format	3	1718.76	4.63319	1718.76	573.926	14.3669	0.00139986	Removed
FLACIHNLK	Carbamidomethylation of C@4[57.0215]	307125:all_format	3	1114.59	4.19884	1114.6	372.538	36.7698	0.000506842	Retained
EENPEGPPNANEDYR	-	378040:all_format	2	1729.72	1.11758	1729.72	865.865	41.7447	0.0001	Retained
YSTGSDSASFPHTTPSMCLNPDLEGPPLELTK	Carbamidomethylation of C@18[57.0215]	90351:all_format	3	3448.57	1.6828	3448.58	1150.53	41.3722	9.999e-05	Retained
VGNMSESELGR	-	457236:all_format	2	1177.53	4.94879	1177.54	589.774	33.8445	0.000101082	Retained
ERGMEEGEFSEAR	Oxidation of M@4[15.9949]	395209:all_format	2	1541.63	9.14502	1541.64	771.821	32.7433	0.00010019	Retained
SFFCCSSVLDALEGK	Carbamidomethylation of C@4[57.0215];Carbamidomethylation of C@5[57.0215]	447270:all_format	3	1718.76	5.05932	1718.76	573.926	14.6931	0.00429957	Removed
TEEEDVPSDLTAEER	-	369868:all_format	2	1718.75	1.35153	1718.75	860.38	27.4656	9.999e-05	Retained
DPWYSTVGLLPPVR	-	238527:all_format	2	1598.85	-0.304411	1598.85	800.43	37.5552	9.999e-05	Retained
YSTGSDSASFPHTTPSMCLNPDLEGPPLELTK	Carbamidomethylation of C@18[57.0215]	110788:all_format	3	3448.57	3.48806	3448.58	1150.53	48.5483	9.999e-05	Retained
SSTDSLPGELR	-	459458:all_format	2	1160.56	7.44616	1160.57	581.287	21.986	0.000813256	Retained
ETWVEEDELFQVQAPDEDSTTNITK	-	131169:all_format	4	2923.34	-4.65859	2923.32	731.842	17.1499	0.00459954	Removed
DPWYSTVGLLPPVR	-	257680:all_format	2	1598.84	2.5205	1598.85	800.428	29.3423	9.999e-05	Retained
SSTDSLPGELR	-	459486:all_format	2	1160.56	4.81662	1160.57	581.288	22.0073	0.000711599	Retained
RDPWYSTVGLLPPVR	-	275215:all_format	3	1754.94	2.98565	1754.95	585.988	36.222	9.999e-05	Retained
YSTGSDSASFPHTTPSMCLNPDLEGPPLELTK	Carbamidomethylation of C@18[57.0215]	110794:all_format	3	3448.56	7.20478	3448.58	1150.53	51.0337	9.999e-05	Retained
DGYELSPTAAANFTR	-	67042:all_format	2	1611.75	0.225244	1611.75	806.884	41.6479	9.999e-05	Retained
DGGNPFAEPSELDNPFQASAAAATAELLK	-	137537:all_format	2	2930.38	3.91226	2930.39	1466.2	50.9962	9.999e-05	Retained
LGPGGLDPVEELQK	-	28928:all_format	2	1450.77	-0.12552	1450.77	726.391	37.2886	0.00010001	Retained
ERGMEEGEFSEAR	-	396230:all_format	2	1525.65	-3.34827	1525.65	763.833	20.1513	0.00160305	Removed
DGYELSPTAAANFTR	-	67541:all_format	2	1611.75	0.831145	1611.75	806.883	39.3107	9.999e-05	Retained
MLDAEDIVGTLRPDEK	-	89003:all_format	3	1800.89	0.498453	1800.89	601.305	44.8654	9.999e-05	Removed
SSQSEEEEEVFGIPR	-	429671:all_format	2	1721.77	1.15513	1721.77	861.893	36.4249	9.999e-05	Removed
ERGMEEGEFSEAR	-	395037:all_format	2	1525.63	8.49353	1525.65	763.824	42.4775	0.00010019	Retained
YSTGSDSASFPHTTPSMCLNPDLEGPPLELTK	Carbamidomethylation of C@18[57.0215]	90359:all_format	3	3448.57	1.789	3448.58	1150.53	23.1141	9.999e-05	Retained
EEEMQVDQEEPHVEEQQQQTPAENK	-	368897:all_format	3	3008.29	2.02984	3008.29	1003.77	46.3427	9.999e-05	Retained
QTNPSAMVEEDDPVPEIR	-	429958:all_format	3	2025.93	2.21866	2025.93	676.316	36.6282	9.999e-05	Removed
ENEQGEVDMESHR	Oxidation of M@9[15.9949]	365735:all_format	3	1574.62	1.81119	1574.63	525.882	26.7415	0.00010001	Retained
LQGSATAAEAQVGHQTAR	-	3145:all_format	3	1794.9	-0.354674	1794.9	599.307	81.0175	9.999e-05	Retained
SSQSEEEEEVFGIPR	-	445549:all_format	2	1721.77	3.14027	1721.77	861.892	44.5646	9.999e-05	Removed
ERGMEEGEFSEAR	-	396234:all_format	2	1525.65	-3.50829	1525.65	763.833	16.872	0.00811542	Removed
ERGMEEGEFSEAR	Oxidation of M@4[15.9949]	393238:all_format	2	1541.63	7.64056	1541.64	771.822	32.6131	0.00010019	Retained
LSAQMLVPVTPEVKPK	-	233049:all_format	3	1735.99	1.02326	1735.99	579.67	49.684	9.999e-05	Retained
ENEQGEVDMESHR	-	366694:all_format	3	1558.63	1.29403	1558.63	520.551	51.3557	0.00010001	Retained
ERGMEEGEFSEAR	-	395031:all_format	2	1525.63	8.97361	1525.65	763.824	42.4988	0.00010019	Retained
ERGMEEGEFSEAR	Oxidation of M@4[15.9949]	368442:all_format	2	1541.63	9.77847	1541.64	771.821	32.4867	0.00010019	Retained
GTQEAEEEGSEATPEAGPEGQETAEITDFQR	-	397614:all_format	3	3292.41	1.81856	3292.41	1098.48	51.8738	9.999e-05	Retained
SGGTLVLVGLGSEMTTVPLLHAAIR	-	317993:all_format	3	2491.38	3.12327	2491.38	831.466	49.955	9.999e-05	Retained
DGYELSPTAAANFTR	-	108064:all_format	2	1611.75	2.04295	1611.75	806.882	41.5582	9.999e-05	Retained
DGYELSPTAAANFTR	-	67037:all_format	2	1611.75	0.755407	1611.75	806.883	37.3849	9.999e-05	Retained
QQDNLELSLR	-	6625:all_format	2	1214.63	-1.06196	1214.63	608.321	17.3497	0.00422585	Removed
LQGSATAAEAQVGHQTAR	-	3143:all_format	3	1794.9	-0.150645	1794.9	599.306	56.0818	9.999e-05	Retained
LANQDEGPEDEEDEQNSPVAPTAQPK	-	393901:all_format	3	2807.23	1.75939	2807.24	936.751	63.5043	9.999e-05	Retained
NLEALALDLMEPEQAVDLTYNEGSGSK	-	76222:all_format	3	2906.38	1.41199	2906.39	969.801	28.805	9.999e-05	Retained
EEEMQVDQEEPHVEEQQQQTPAENK	-	368893:all_format	3	3008.28	3.36891	3008.29	1003.77	37.8709	9.999e-05	Retained
ENEQGEVDMESHR	Oxidation of M@9[15.9949]	365762:all_format	2	1574.62	1.33761	1574.63	788.32	26.08	0.00010001	Retained
GAVDDDVAEDIISTVEFNHSGELLATGDK	-	36009:all_format	3	3016.41	-0.0265251	3016.41	1006.48	39.5461	9.999e-05	Retained
TEEEDVPSDLTAEER	-	369864:all_format	2	1718.74	4.61858	1718.75	860.377	27.5181	9.999e-05	Retained
ERGMEEGEFSEAR	-	395316:all_format	2	1525.63	8.49353	1525.65	763.824	29.0786	0.00010019	Retained
TTYFEIFTAACNPSACR	Carbamidomethylation of C@11[57.0215];Carbamidomethylation of C@16[57.0215]	255916:all_format	2	2007.87	3.92738	2007.88	1004.94	47.2677	9.999e-05	Retained
SSQSEEEEEVFGIPR	-	445544:all_format	2	1721.77	2.2186	1721.77	861.893	36.092	9.999e-05	Removed
EEEMGEEEVEREIIK	-	382983:all_format	3	1847.84	1.6334	1847.85	616.955	16.6934	0.00100402	Retained
LASVPAGGAVAVSAAPGSAAPAAGSAPAAEEK	-	64932:all_format	3	2702.38	1.71255	2702.39	901.802	15.8922	0.00129987	Removed
SEVADFEPER	-	394602:all_format	2	1177.52	0.632142	1177.53	589.769	26.0539	0.000108637	Retained
TTYFEIFTAACNPSACR	Carbamidomethylation of C@11[57.0215];Carbamidomethylation of C@16[57.0215]	255910:all_format	2	2007.87	3.6842	2007.88	1004.94	44.6836	9.999e-05	Retained
TEQGPTGVTMTSNPITWGQIK	-	171403:all_format	2	2245.1	3.17616	2245.1	1123.56	38.6924	9.999e-05	Retained
LASVPAGGAVAVSAAPGSAAPAAGSAPAAEEK	-	64938:all_format	3	2702.38	1.44152	2702.39	901.802	48.0395	9.999e-05	Retained
AQEDALAQQAFEEAR	-	428973:all_format	2	1675.78	0.614094	1675.78	838.897	40.9292	0.0001	Retained
ERGMEEGEFSEAR	-	395310:all_format	2	1525.63	8.81358	1525.65	763.824	37.0867	0.00010019	Retained
SMYEEINETR	-	425528:all_format	2	1270.55	0.532736	1270.55	636.282	29.2137	0.000108637	Retained
ERGMEEGEFSEAR	Oxidation of M@4[15.9949]	393234:all_format	2	1541.63	8.59074	1541.64	771.821	32.6073	0.00010019	Retained
SFFCCSSVLDALEGK	Carbamidomethylation of C@4[57.0215];Carbamidomethylation of C@5[57.0215]	431117:all_format	3	1718.76	0.0522581	1718.76	573.929	12.4395	0.0009999	Removed
ATPEPGDEGEPGR	-	366365:all_format	2	1310.57	1.06042	1310.57	656.294	35.3209	0.00010022	Retained
ERGMEEGEFSEAR	Oxidation of M@4[15.9949]	393559:all_format	2	1541.63	9.62011	1541.64	771.821	32.642	0.00010019	Retained
MLDAEDIVGTLRPDEK	-	88998:all_format	3	1800.89	1.82023	1800.89	601.304	18.5057	0.00019998	Retained
ERGMEEGEFSEAR	-	395689:all_format	2	1525.64	7.45337	1525.65	763.825	36.4385	0.00010019	Retained
ENEQGEVDMESHR	-	366691:all_format	3	1558.63	0.3542	1558.63	520.551	51.344	0.00010001	Retained
KSMYEEINETR	-	463741:all_format	2	1398.64	3.18405	1398.64	700.328	18.0777	0.00352503	Removed
ENEQGEVDMESHR	Oxidation of M@9[15.9949]	366737:all_format	3	1574.62	1.11348	1574.63	525.882	47.3613	0.00010001	Retained
DGYELSPTAAANFTR	-	67548:all_format	2	1611.75	1.1341	1611.75	806.883	33.1901	9.999e-05	Retained
FEESKEPVADEEEEDSDDDVEPITEFR	-	383666:all_format	3	3184.33	2.52218	3184.34	1062.45	38.4382	9.999e-05	Retained
LSIRPNIQNPDPAVYQLR	-	189431:all_format	3	2093.13	3.1043	2093.14	698.718	21.8231	9.999e-05	Retained
KSMYEEINETR	-	394956:all_format	2	1398.64	5.97693	1398.64	700.326	21.5462	0.00020143	Removed
EENPEGPPNANEDYR	-	378044:all_format	2	1729.71	2.67018	1729.72	865.864	41.7795	0.0001	Retained
SGGTLVLVGLGSEMTTVPLLHAAIR	-	317999:all_format	3	2491.38	3.12327	2491.38	831.466	41.3749	9.999e-05	Retained
DGYELSPTAAANFTR	-	108069:all_format	2	1611.75	2.3459	1611.75	806.882	37.3814	9.999e-05	Retained
ENEQGEVDMESHR	-	376800:all_format	3	1558.63	3.29116	1558.63	520.549	15.0891	0.00170017	Removed
LGPGGLDPVEELQK	-	28922:all_format	2	1450.77	-0.12552	1450.77	726.391	29.4252	0.00010001	Retained
TEQGPTGVTMTSNPITWGQIK	-	171411:all_format	2	2245.1	3.39365	2245.1	1123.56	32.2524	9.999e-05	Retained
LGEVEDSTMPIR	-	478701:all_format	2	1345.66	-0.357255	1345.65	673.835	40.7136	0.00010001	Retained
GAVDDDVAEDIISTVEFNHSGELLATGDK	-	36004:all_format	3	3016.42	-0.147931	3016.41	1006.48	39.6163	9.999e-05	Retained
ERGMEEGEFSEAREDMAALEK	-	431400:all_format	3	2413.04	5.90043	2413.05	805.353	14.1976	0.00059994	Removed
VALPTSK	-	59037:all_format	2	714.427	0.51869	714.428	358.221	12.7475	0.00886918	Removed
GYATDESTVSSVQGSR	-	458164:all_format	2	1642.73	5.76794	1642.74	822.374	28.3926	9.999e-05	Retained
RDPWYSTVGLLPPVR	-	275202:all_format	3	1754.94	2.67264	1754.95	585.988	36.1331	9.999e-05	Retained
LGEVEDSTMPIR	-	478708:all_format	2	1345.65	-0.0851115	1345.65	673.835	38.6973	0.00010001	Retained
GYATDESTVSSVQGSR	-	458166:all_format	2	1642.74	5.02485	1642.74	822.375	50.4616	9.999e-05	Retained
DPWYSTVGLLPPVR	-	257675:all_format	2	1598.84	2.21511	1598.85	800.428	29.2218	9.999e-05	Retained
SEVADFEPER	-	394606:all_format	2	1177.52	0.735809	1177.53	589.769	26.0756	0.000108637	Retained
SSQSEEEEEVFGIPR	-	429665:all_format	2	1721.77	1.65141	1721.77	861.893	31.9624	9.999e-05	Removed
FLACIHNLK	Carbamidomethylation of C@4[57.0215]	307119:all_format	3	1114.59	4.77382	1114.6	372.537	32.8525	0.000506842	Retained
GTQEAEEEGSEATPEAGPEGQETAEITDFQR	-	397660:all_format	3	3292.4	2.93085	3292.41	1098.47	44.5547	9.999e-05	Retained
VGNMSESELGR	-	457232:all_format	2	1177.53	5.05246	1177.54	589.774	37.8947	0.000101082	Retained
