# Supplementary material for: PepQuery enables fast, accurate, and convenient proteomic validation of novel genomic alterations
Source: HighWire-hosted journal article supplement (doi:10.1101/gr.235028.118), 2019-01-04
Supplement: Supplemental_Table_S8.xlsx [file Supplemental_Table_S8.xlsx]

## Sheet: S8 legend
Supplemental Table S8: Identification result of 55 junction peptides using MVH.

## Sheet: S8
peptide	modification	spectrumID	charge	exp_mass	ppm	pep_mass	mz	score	pvalue	mod_filtering
GAVDDDVAEDIISTVEFNHSGELLATGDK	-	36185:all_format	3	3016.42	-1.6048	3016.41	1006.48	87.7831	9.999e-05	Retained
ENEQGEVDMESHR	-	376795:all_format	2	1558.63	1.16803	1558.63	780.322	66.1421	0.00010001	Retained
LANQDEGPEDEEDEQNSPVAPTAQPK	-	393908:all_format	3	2807.23	2.15075	2807.24	936.751	73.3541	9.999e-05	Retained
DGGNPFAEPSELDNPFQASAAAATAELLK	-	137542:all_format	3	2930.39	2.33384	2930.39	977.803	45.1948	9.999e-05	Retained
ETWVEEDELFQVQAPDEDSTTNITK	-	467426:all_format	3	2923.3	7.82232	2923.32	975.441	103.526	9.999e-05	Retained
SFFCCSSVLDALEGK	Carbamidomethylation of C@4[57.0215];Carbamidomethylation of C@5[57.0215]	447226:all_format	3	1718.76	4.63319	1718.76	573.926	24.0983	0.00079992	Removed
FLACIHNLK	Carbamidomethylation of C@4[57.0215]	307125:all_format	3	1114.59	4.19884	1114.6	372.538	69.1645	0.000253421	Retained
YSTGSDSASFPHTTPSMCLNPDLEGPPLELTK	Carbamidomethylation of C@18[57.0215]	90351:all_format	3	3448.57	1.6828	3448.58	1150.53	54.4826	9.999e-05	Retained
VGNMSESELGR	-	457236:all_format	2	1177.53	4.94879	1177.54	589.774	62.3936	0.000101082	Retained
ERGMEEGEFSEAR	Oxidation of M@4[15.9949]	395209:all_format	2	1541.63	9.14502	1541.64	771.821	37.8485	0.00010019	Retained
SSTDSLPGELR	-	459458:all_format	2	1160.56	7.44616	1160.57	581.287	47.32	0.000406628	Removed
SSTDSLPGELR	-	459486:all_format	2	1160.56	4.81662	1160.57	581.288	53.2733	0.000101657	Retained
RDPWYSTVGLLPPVR	-	275215:all_format	3	1754.94	2.98565	1754.95	585.988	74.846	9.999e-05	Retained
YSTGSDSASFPHTTPSMCLNPDLEGPPLELTK	Carbamidomethylation of C@18[57.0215]	110794:all_format	3	3448.56	7.20478	3448.58	1150.53	72.1946	9.999e-05	Retained
DGYELSPTAAANFTR	-	67042:all_format	2	1611.75	0.225244	1611.75	806.884	71.887	9.999e-05	Removed
YISLIYTNYAGK	-	310905:all_format	2	1404.72	4.56275	1404.73	703.369	46.5862	0.00010017	Retained
DGGNPFAEPSELDNPFQASAAAATAELLK	-	137537:all_format	2	2930.38	3.91226	2930.39	1466.2	81.9594	9.999e-05	Retained
LGPGGLDPVEELQK	-	28928:all_format	2	1450.77	-0.12552	1450.77	726.391	63.6345	0.00010001	Retained
MLDAEDIVGTLRPDEK	-	89003:all_format	3	1800.89	0.498453	1800.89	601.305	59.4073	9.999e-05	Removed
EEEMQVDQEEPHVEEQQQQTPAENK	-	368897:all_format	3	3008.29	2.02984	3008.29	1003.77	74.4653	9.999e-05	Retained
VALPTSK	-	59034:all_format	2	714.427	0.51869	714.428	358.221	29.077	0.00443459	Retained
ENEQGEVDMESHR	Oxidation of M@9[15.9949]	365735:all_format	3	1574.62	1.81119	1574.63	525.882	29.3178	0.00010001	Removed
LQGSATAAEAQVGHQTAR	-	3145:all_format	3	1794.9	-0.354674	1794.9	599.307	121.91	9.999e-05	Retained
SSQSEEEEEVFGIPR	-	445549:all_format	2	1721.77	3.14027	1721.77	861.892	65.2416	9.999e-05	Removed
ERGMEEGEFSEAR	-	396234:all_format	2	1525.65	-3.50829	1525.65	763.833	43.5728	0.00010019	Removed
LSAQMLVPVTPEVKPK	-	233049:all_format	3	1735.99	1.02326	1735.99	579.67	91.5291	9.999e-05	Retained
ERGMEEGEFSEAR	-	395031:all_format	2	1525.63	8.97361	1525.65	763.824	74.3146	0.00010019	Retained
ERGMEEGEFSEAR	Oxidation of M@4[15.9949]	368442:all_format	2	1541.63	9.77847	1541.64	771.821	52.4778	0.00010019	Retained
GTQEAEEEGSEATPEAGPEGQETAEITDFQR	-	397614:all_format	3	3292.41	1.81856	3292.41	1098.48	83.4479	9.999e-05	Retained
DGYELSPTAAANFTR	-	108064:all_format	2	1611.75	2.04295	1611.75	806.882	69.3852	9.999e-05	Retained
DGYELSPTAAANFTR	-	67037:all_format	2	1611.75	0.755407	1611.75	806.883	70.6811	9.999e-05	Removed
LQGSATAAEAQVGHQTAR	-	3143:all_format	3	1794.9	-0.150645	1794.9	599.306	87.7762	9.999e-05	Retained
LANQDEGPEDEEDEQNSPVAPTAQPK	-	393901:all_format	3	2807.23	1.75939	2807.24	936.751	73.4674	9.999e-05	Retained
NLEALALDLMEPEQAVDLTYNEGSGSK	-	76222:all_format	3	2906.38	1.41199	2906.39	969.801	46.2866	9.999e-05	Retained
EEEMQVDQEEPHVEEQQQQTPAENK	-	368893:all_format	3	3008.28	3.36891	3008.29	1003.77	72.083	9.999e-05	Retained
TTYFEIFTAACNPSACR	Carbamidomethylation of C@11[57.0215];Carbamidomethylation of C@16[57.0215]	255916:all_format	2	2007.87	3.92738	2007.88	1004.94	77.9012	9.999e-05	Retained
SSQSEEEEEVFGIPR	-	445544:all_format	2	1721.77	2.2186	1721.77	861.893	56.435	9.999e-05	Removed
EEEMGEEEVEREIIK	-	382983:all_format	3	1847.84	1.6334	1847.85	616.955	71.8774	0.000100402	Retained
SEVADFEPER	-	394602:all_format	2	1177.52	0.632142	1177.53	589.769	54.4487	0.000108637	Retained
TTYFEIFTAACNPSACR	Carbamidomethylation of C@11[57.0215];Carbamidomethylation of C@16[57.0215]	255910:all_format	2	2007.87	3.6842	2007.88	1004.94	73.8883	9.999e-05	Retained
ERGMEEGEFSEAR	-	395310:all_format	2	1525.63	8.81358	1525.65	763.824	54.0272	0.00010019	Retained
SMYEEINETR	-	425528:all_format	2	1270.55	0.532736	1270.55	636.282	48.6788	0.000108637	Retained
ATPEPGDEGEPGR	-	366365:all_format	2	1310.57	1.06042	1310.57	656.294	80.8049	0.00010022	Retained
ERGMEEGEFSEAR	Oxidation of M@4[15.9949]	393559:all_format	2	1541.63	9.62011	1541.64	771.821	50.4482	0.00010019	Retained
ERGMEEGEFSEAR	-	395689:all_format	2	1525.64	7.45337	1525.65	763.825	50.091	0.00010019	Retained
DGYELSPTAAANFTR	-	67548:all_format	2	1611.75	1.1341	1611.75	806.883	71.0259	9.999e-05	Removed
KSMYEEINETR	-	394956:all_format	2	1398.64	5.97693	1398.64	700.326	34.5026	0.000503575	Removed
SGGTLVLVGLGSEMTTVPLLHAAIR	-	317999:all_format	3	2491.38	3.12327	2491.38	831.466	101.553	9.999e-05	Retained
DGYELSPTAAANFTR	-	108069:all_format	2	1611.75	2.3459	1611.75	806.882	59.2859	9.999e-05	Retained
LGPGGLDPVEELQK	-	28922:all_format	2	1450.77	-0.12552	1450.77	726.391	63.6246	0.00010001	Retained
TEQGPTGVTMTSNPITWGQIK	-	171411:all_format	2	2245.1	3.39365	2245.1	1123.56	82.1079	9.999e-05	Retained
ESIAQVR	-	438459:all_format	2	801.431	4.70138	801.434	401.723	43.7115	0.00221729	Retained
GAVDDDVAEDIISTVEFNHSGELLATGDK	-	36004:all_format	3	3016.42	-0.147931	3016.41	1006.48	86.2971	9.999e-05	Retained
ERGMEEGEFSEAREDMAALEK	-	431400:all_format	3	2413.04	5.90043	2413.05	805.353	51.012	9.999e-05	Retained
GYATDESTVSSVQGSR	-	458164:all_format	2	1642.73	5.76794	1642.74	822.374	54.5484	9.999e-05	Retained
RDPWYSTVGLLPPVR	-	275202:all_format	3	1754.94	2.67264	1754.95	585.988	62.8965	9.999e-05	Retained
SEVADFEPER	-	394606:all_format	2	1177.52	0.735809	1177.53	589.769	58.0769	0.000108637	Retained
SSQSEEEEEVFGIPR	-	429665:all_format	2	1721.77	1.65141	1721.77	861.893	60.3287	9.999e-05	Removed
FLACIHNLK	Carbamidomethylation of C@4[57.0215]	307119:all_format	3	1114.59	4.77382	1114.6	372.537	67.0379	0.000253421	Retained
GTQEAEEEGSEATPEAGPEGQETAEITDFQR	-	397660:all_format	3	3292.4	2.93085	3292.41	1098.47	79.274	9.999e-05	Retained
LSAQMLVPVTPEVKPK	-	233055:all_format	3	1735.99	0.812304	1735.99	579.67	74.4003	9.999e-05	Retained
LSIRPNIQNPDPAVYQLR	-	189434:all_format	3	2093.12	6.86589	2093.14	698.715	84.8504	9.999e-05	Retained
ERGMEEGEFSEAREDMAALEK	-	431412:all_format	3	2413.03	9.2392	2413.05	805.351	68.7006	9.999e-05	Retained
ATPEPGDEGEPGR	-	366361:all_format	2	1310.57	0.128992	1310.57	656.294	76.7782	0.00010022	Retained
KSMYEEINETR	-	394949:all_format	2	1398.64	5.54055	1398.64	700.326	33.3454	0.000705006	Removed
ENEQGEVDMESHR	Oxidation of M@9[15.9949]	366734:all_format	3	1574.63	-0.16566	1574.63	525.883	48.8998	0.00010001	Retained
EENPEGPPNANEDYR	-	378040:all_format	2	1729.72	1.11758	1729.72	865.865	66.1675	0.0001	Retained
ETWVEEDELFQVQAPDEDSTTNITK	-	467420:all_format	3	2923.31	5.06633	2923.32	975.444	78.3759	9.999e-05	Retained
SFFCCSSVLDALEGK	Carbamidomethylation of C@4[57.0215];Carbamidomethylation of C@5[57.0215]	447270:all_format	3	1718.76	5.05932	1718.76	573.926	25.4468	0.00259974	Removed
TEEEDVPSDLTAEER	-	369868:all_format	2	1718.75	1.35153	1718.75	860.38	79.7025	9.999e-05	Retained
DPWYSTVGLLPPVR	-	238527:all_format	2	1598.85	-0.304411	1598.85	800.43	63.6274	9.999e-05	Retained
YSTGSDSASFPHTTPSMCLNPDLEGPPLELTK	Carbamidomethylation of C@18[57.0215]	110788:all_format	3	3448.57	3.48806	3448.58	1150.53	82.0193	9.999e-05	Retained
DPWYSTVGLLPPVR	-	257680:all_format	2	1598.84	2.5205	1598.85	800.428	70.3728	9.999e-05	Retained
ERGMEEGEFSEAR	-	396230:all_format	2	1525.65	-3.34827	1525.65	763.833	45.7723	0.00010019	Removed
ISARVMSLFSNK	Oxidation of M@6[15.9949]	349523:all_format	2	1367.72	2.67936	1367.72	684.867	24.6932	0.00290203	Removed
DGYELSPTAAANFTR	-	67541:all_format	2	1611.75	0.831145	1611.75	806.883	77.4464	9.999e-05	Retained
SSQSEEEEEVFGIPR	-	429671:all_format	2	1721.77	1.15513	1721.77	861.893	59.0064	9.999e-05	Removed
ERGMEEGEFSEAR	-	395037:all_format	2	1525.63	8.49353	1525.65	763.824	63.4264	0.00010019	Retained
YSTGSDSASFPHTTPSMCLNPDLEGPPLELTK	Carbamidomethylation of C@18[57.0215]	90359:all_format	3	3448.57	1.789	3448.58	1150.53	40.4583	9.999e-05	Retained
QTNPSAMVEEDDPVPEIR	-	429958:all_format	3	2025.93	2.21866	2025.93	676.316	67.7256	9.999e-05	Removed
ERGMEEGEFSEAR	Oxidation of M@4[15.9949]	393238:all_format	2	1541.63	7.64056	1541.64	771.822	52.6596	0.00010019	Retained
ENEQGEVDMESHR	-	366694:all_format	3	1558.63	1.29403	1558.63	520.551	83.5548	0.00010001	Retained
SGGTLVLVGLGSEMTTVPLLHAAIR	-	317993:all_format	3	2491.38	3.12327	2491.38	831.466	110.507	9.999e-05	Retained
ENEQGEVDMESHR	Oxidation of M@9[15.9949]	365762:all_format	2	1574.62	1.33761	1574.63	788.32	42.0112	0.00010001	Retained
GAVDDDVAEDIISTVEFNHSGELLATGDK	-	36009:all_format	3	3016.41	-0.0265251	3016.41	1006.48	88.7155	9.999e-05	Retained
TEEEDVPSDLTAEER	-	369864:all_format	2	1718.74	4.61858	1718.75	860.377	77.2842	9.999e-05	Retained
ERGMEEGEFSEAR	-	395316:all_format	2	1525.63	8.49353	1525.65	763.824	56.4169	0.00010019	Retained
LASVPAGGAVAVSAAPGSAAPAAGSAPAAEEK	-	64932:all_format	3	2702.38	1.71255	2702.39	901.802	54.7155	9.999e-05	Retained
TEQGPTGVTMTSNPITWGQIK	-	171403:all_format	2	2245.1	3.17616	2245.1	1123.56	84.2885	9.999e-05	Retained
LASVPAGGAVAVSAAPGSAAPAAGSAPAAEEK	-	64938:all_format	3	2702.38	1.44152	2702.39	901.802	84.7851	9.999e-05	Retained
AQEDALAQQAFEEAR	-	428973:all_format	2	1675.78	0.614094	1675.78	838.897	58.4912	0.0001	Retained
ERGMEEGEFSEAR	Oxidation of M@4[15.9949]	393234:all_format	2	1541.63	8.59074	1541.64	771.821	52.5672	0.00010019	Retained
SFFCCSSVLDALEGK	Carbamidomethylation of C@4[57.0215];Carbamidomethylation of C@5[57.0215]	431117:all_format	3	1718.76	0.0522581	1718.76	573.929	19.2239	0.00379962	Removed
ISARVMSLFSNK	-	270724:all_format	2	1351.74	-9.96265	1351.73	676.878	26.8408	0.00060042	Removed
MLDAEDIVGTLRPDEK	-	88998:all_format	3	1800.89	1.82023	1800.89	601.304	75.2187	9.999e-05	Retained
ENEQGEVDMESHR	-	366691:all_format	3	1558.63	0.3542	1558.63	520.551	86.5005	0.00010001	Retained
KSMYEEINETR	-	463741:all_format	2	1398.64	3.18405	1398.64	700.328	33.626	0.00765435	Removed
ENEQGEVDMESHR	Oxidation of M@9[15.9949]	366737:all_format	3	1574.62	1.11348	1574.63	525.882	49.1565	0.00010001	Retained
FEESKEPVADEEEEDSDDDVEPITEFR	-	383666:all_format	3	3184.33	2.52218	3184.34	1062.45	107.097	9.999e-05	Retained
LSIRPNIQNPDPAVYQLR	-	189431:all_format	3	2093.13	3.1043	2093.14	698.718	85.8247	9.999e-05	Retained
EENPEGPPNANEDYR	-	378044:all_format	2	1729.71	2.67018	1729.72	865.864	65.6642	0.0001	Retained
ENEQGEVDMESHR	Oxidation of M@9[15.9949]	482937:all_format	2	1574.63	-3.0037	1574.63	788.323	19.2822	0.00510051	Removed
ENEQGEVDMESHR	-	376800:all_format	3	1558.63	3.29116	1558.63	520.549	57.4939	0.00020002	Retained
LGEVEDSTMPIR	-	478701:all_format	2	1345.66	-0.357255	1345.65	673.835	59.9243	0.00010001	Retained
ESIAQVR	-	438463:all_format	2	801.431	4.77754	801.434	401.723	46.0786	0.00221729	Retained
VALPTSK	-	59037:all_format	2	714.427	0.51869	714.428	358.221	29.718	0.00886918	Removed
SFFCCSSVLDALEGK	Carbamidomethylation of C@4[57.0215];Carbamidomethylation of C@5[57.0215]	431100:all_format	3	1718.76	-0.267342	1718.76	573.929	18.7383	0.00279972	Removed
ENEQGEVDMESHR	-	27818:all_format	2	1558.63	-1.96473	1558.63	780.325	13.3115	0.0060006	Removed
LGEVEDSTMPIR	-	478708:all_format	2	1345.65	-0.0851115	1345.65	673.835	66.5779	0.00010001	Retained
GYATDESTVSSVQGSR	-	458166:all_format	2	1642.74	5.02485	1642.74	822.375	73.9998	9.999e-05	Retained
ISARVMSLFSNK	Oxidation of M@6[15.9949]	349517:all_format	2	1367.72	2.59011	1367.72	684.867	27.1037	0.00150105	Removed
DPWYSTVGLLPPVR	-	257675:all_format	2	1598.84	2.21511	1598.85	800.428	72.6072	9.999e-05	Retained
VGNMSESELGR	-	457232:all_format	2	1177.53	5.05246	1177.54	589.774	62.7335	0.000101082	Retained
